# Supplementary material for: Trimetallic PdCuAu Nanoparticles for Temperature Sensing and Fluorescence Detection of H2O2 and Glucose
Source: PubMed Central journal article supplement (PMC7154178; doi:10.3389/fchem.2020.00244), 2020-04-07
Supplement: Data_Sheet_1.pdf [file Data_Sheet_1.pdf]

## Supporting Information

# Trimetallic PdCuAu Nanoparticles for Temperature Sensing and Colorimetric Detection of H<sub>2</sub>O<sub>2</sub> and Glucose

Furong Nie<sup>§, 1</sup>, Lu Ga<sup>†, 1</sup>, Jun Ai<sup>§, \*</sup>, Yong Wang<sup>£, \*</sup>

<sup>§</sup> College of Chemistry and Environmental Science, Inner Mongolia Normal University, 81 Zhaowudalu, Hohhot 010022, China.

<sup>†</sup> College of Pharmacy, Inner Mongolia Medical University, Jinchuankai faqu, Hohhot 010110, China.

<sup>£</sup> College of Geographical Science, Inner Mongolia Normal University, 81 Zhaowudalu, Hohhot 010022, China.

*1: These authors contributed equally to this work.*

Corresponding Author: Jun Ai, Yong Wang

Affiliation- College of Chemistry and Environmental Science, Inner Mongolia Normal University

E-mail: imacaj01@163.com; wangyonglsx@163.com

### Table of Contents

1. **Figure S1.** TEM-EDS spectrum of the as-prepared PdCuAu NPs ( the sample dropwise adding one drop of the suspension on a nickel TEM grid coated with a holey carbon film).....S3
2. **Figure S2.** The fluorescence spectra of PdCuAu NPs at different Pd/Cu/Au molar ratios...S4
3. **Figure S3.** The TEM images of PdCuAu NPs at different Pd/Cu/Au molar ratios.....S4
4. **Figure S4.** (a) The fluorescence spectra of PdCuAu NPs at different reaction times. (b) The fluorescence spectra of PdCuAu NPs at different temperatures.....S5
5. **Figure S5.** The TEM images of PdCuAu NPs at different reaction times.....S5

|                                                                                                                                                                                                                                                                                                                                                                                                                                                                         |     |
|-------------------------------------------------------------------------------------------------------------------------------------------------------------------------------------------------------------------------------------------------------------------------------------------------------------------------------------------------------------------------------------------------------------------------------------------------------------------------|-----|
| 6. <b>Figure S6.</b> The TEM images of PdCuAu NPs at different temperatures.....                                                                                                                                                                                                                                                                                                                                                                                        | S6  |
| 7. <b>Figure S7.</b> (a) The fluorescence spectra of CuAu, PdAu, PdCu and PdCuAu NPs. (b) The fluorescence spectra of PdCuAu NPs and without Cu <sup>2+</sup> , HCl, KBr, PVP, respectively. (c) The fluorescence spectra of the effect of HCl on PdCuAu NPs.....                                                                                                                                                                                                       | S7  |
| 8. <b>Figure S8.</b> TEM images of the CuAu, PdAu and PdCu NPs prepared under the identical conditions used for the typical synthesis.....                                                                                                                                                                                                                                                                                                                              | S7  |
| 9. <b>Figure S9.</b> TEM images of the samples prepared without KBr, Cu <sup>2+</sup> , PVP, respectively, under the identical conditions used for the typical synthesis.....                                                                                                                                                                                                                                                                                           | S7  |
| 10. <b>Figure S10.</b> TEM images of the effect of HCl on PdCuAu NPs.....                                                                                                                                                                                                                                                                                                                                                                                               | S8  |
| 11. <b>Figure S11.</b> Fluorescence spectra of the PdCuAu NPs with time ranging from 5 to 45 day.....                                                                                                                                                                                                                                                                                                                                                                   | S8  |
| 12. <b>Figure S12.</b> The effect of pH (a) and temperature (b) on the catalytic activity of PdCuAu NPs.....                                                                                                                                                                                                                                                                                                                                                            | S9  |
| 13. <b>Figure S13.</b> Steady-state kinetic analysis by the Michaelis-Menten model and catalytic mechanism of the reaction catalyzed by PdCuAu NPs. (a): TMB concentration was fixed at 1.0 mM and the H <sub>2</sub> O <sub>2</sub> concentration was varied. (b): H <sub>2</sub> O <sub>2</sub> concentration was fixed at 0.1 mM and the TMB concentration was varied. (c, d): Error bars represent the standard deviation based on three repeated measurements..... | S9  |
| 14. <b>Figure S14.</b> The selectivity of the glucose/GOx/PdCuAu NPs/TMB.....                                                                                                                                                                                                                                                                                                                                                                                           | S10 |

15. **Table S1.** Comparison of the kinetic parameters of PdCuAu NPs with other reported typical enzyme mimics.  $K_m$  is the Michaelis-Menten constant,  $V_{max}$  is the maximal reaction velocity,  $[E]$  is the concentration of nanoparticles and  $k_{cat}$  is the catalytic constant, where  $k_{cat} = V_{max} / [E]$  .....S11

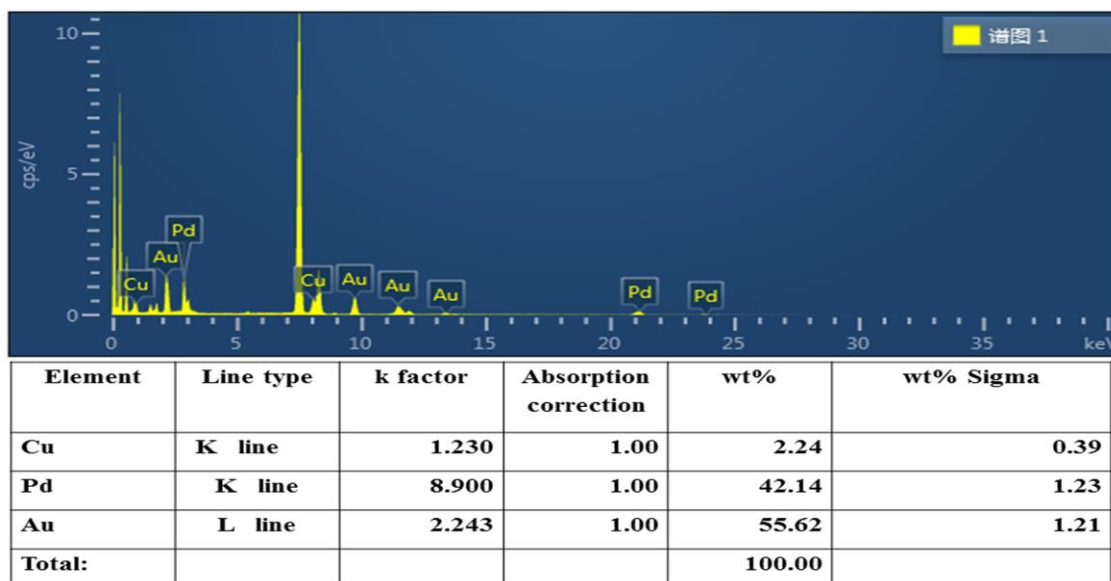

**Figure S1.** TEM-EDS spectrum of the as-prepared PdCuAu NPs ( the sample dropwise adding one drop of the suspension on a nickel TEM grid coated with a holey carbon film).

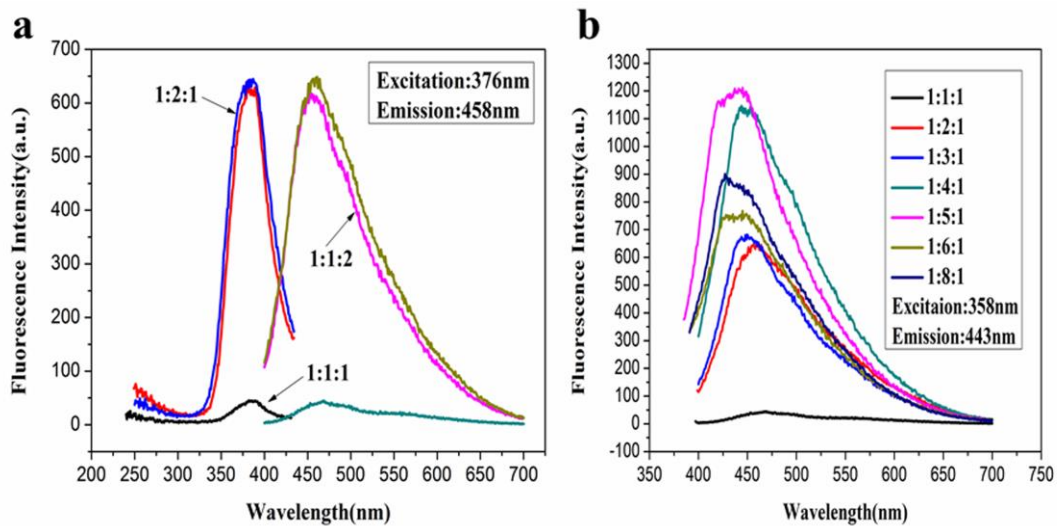

**Figure S2.** The fluorescence spectra of PdCuAu NPs at different Pd/Cu/Au molar ratios.

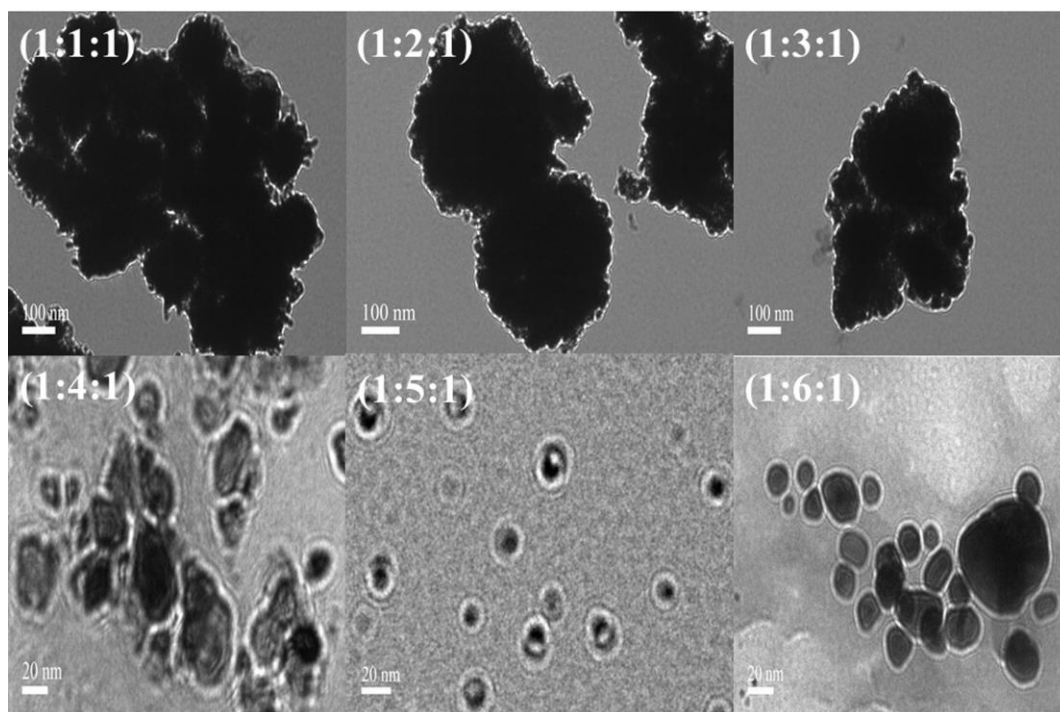

**Figure S3.** The TEM images of PdCuAu NPs at different Pd/Cu/Au molar ratios.

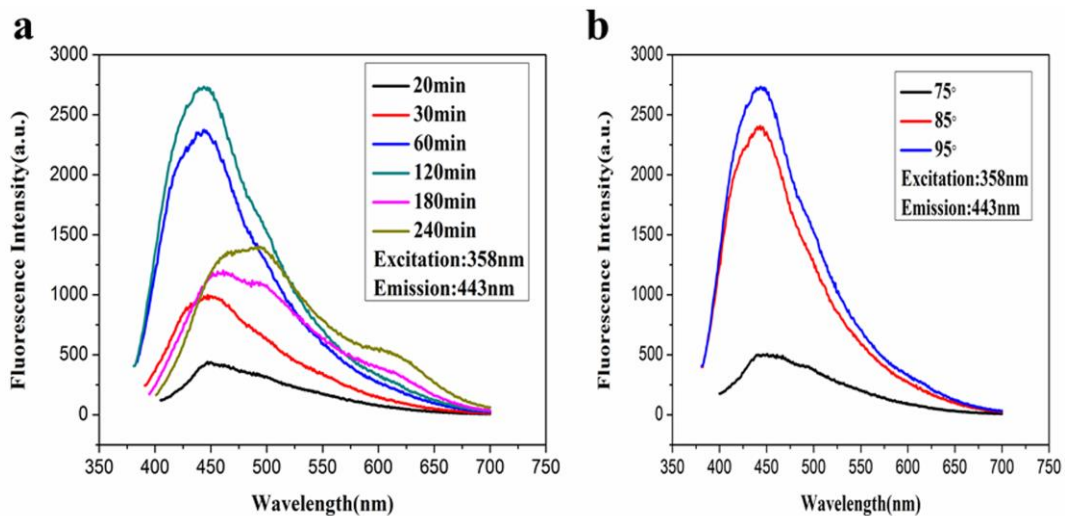

**Figure S4.** (a) The fluorescence spectra of PdCuAu NPs at different reaction times. (b) The fluorescence spectra of PdCuAu NPs at different temperatures.

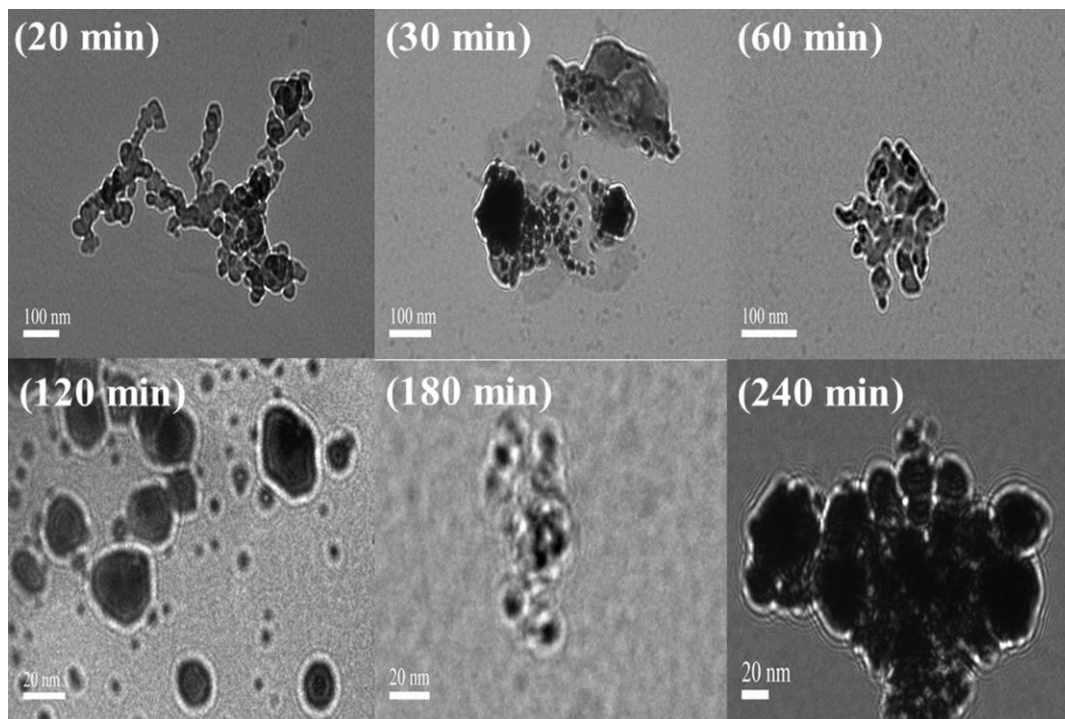

**Figure S5.** The TEM images of PdCuAu NPs at different reaction times.

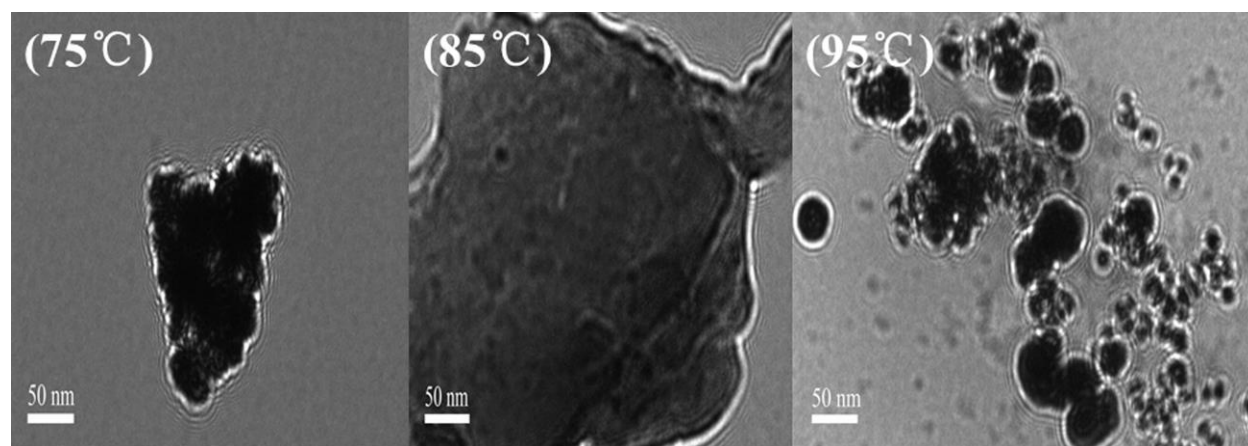

**Figure S6.** The TEM images of PdCuAu NPs at different temperatures.

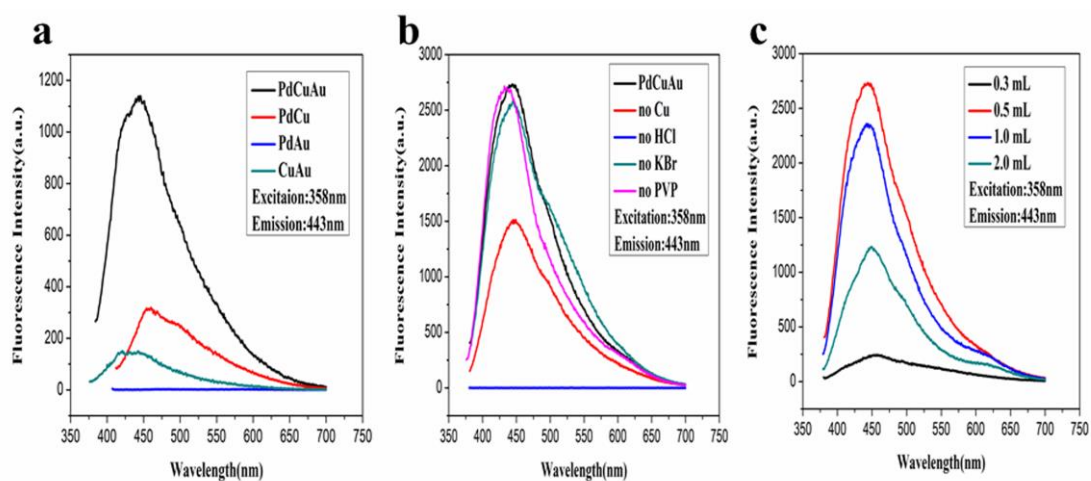

**Figure S7.** (a) The fluorescence spectra of CuAu, PdAu, PdCu and PdCuAu NPs. (b) The fluorescence spectra of PdCuAu NPs and without  $\text{Cu}^{2+}$ , HCl, KBr, PVP, respectively. (c) The fluorescence spectra of the effect of HCl on PdCuAu NPs.

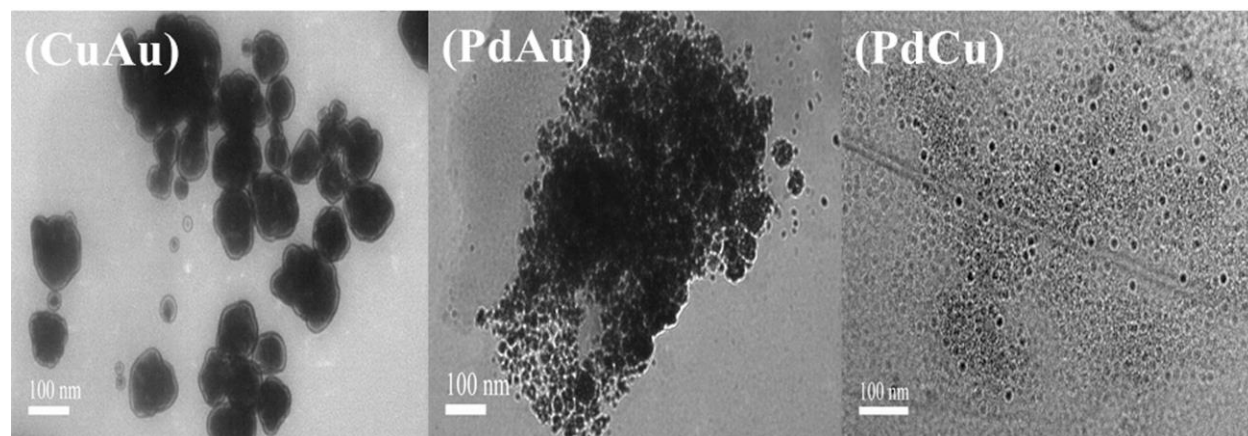

**Figure S8.** TEM images of the CuAu, PdAu and PdCu NPs prepared under the identical conditions used for the typical synthesis.

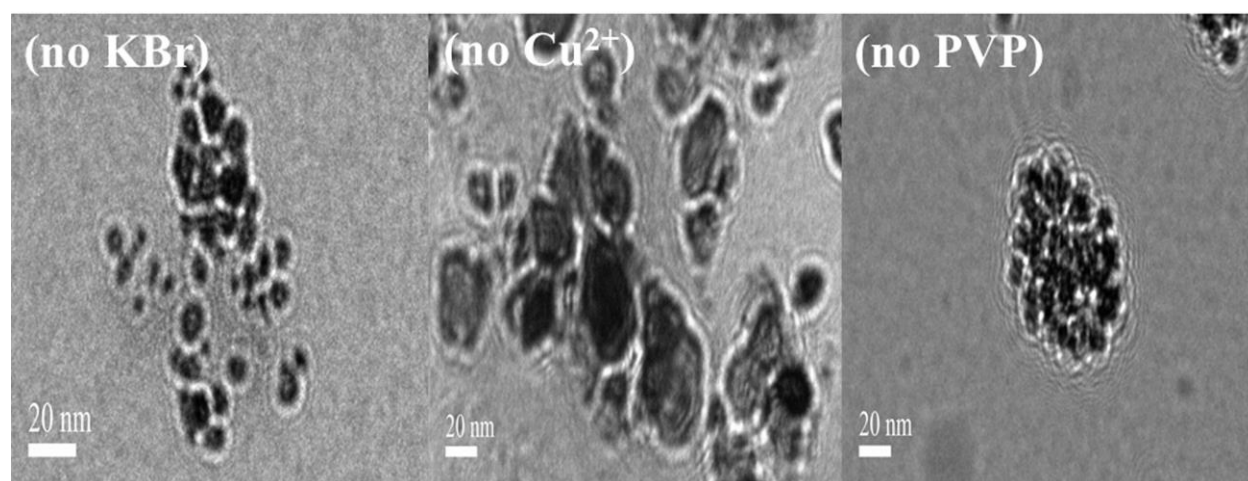

**Figure S9.** TEM images of the samples prepared without KBr, Cu<sup>2+</sup>, PVP, respectively, under the identical conditions used for the typical synthesis.

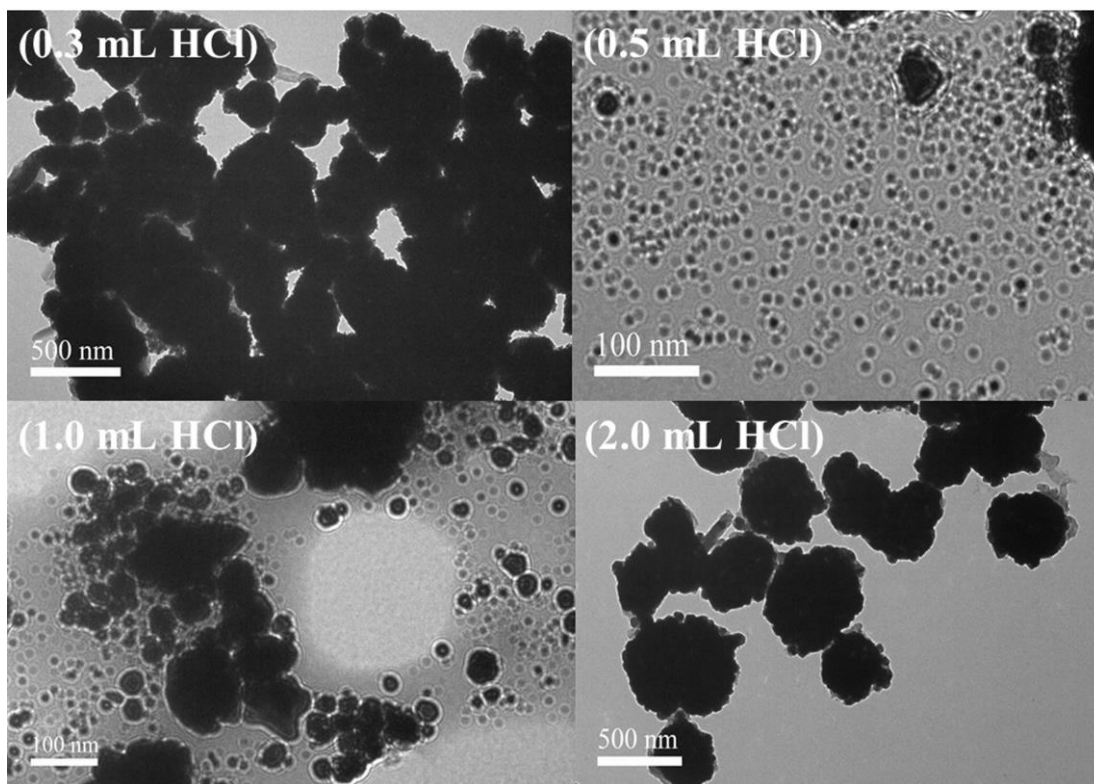

**Figure S10.** TEM images of the effect of HCl on PdCuAu NPs.

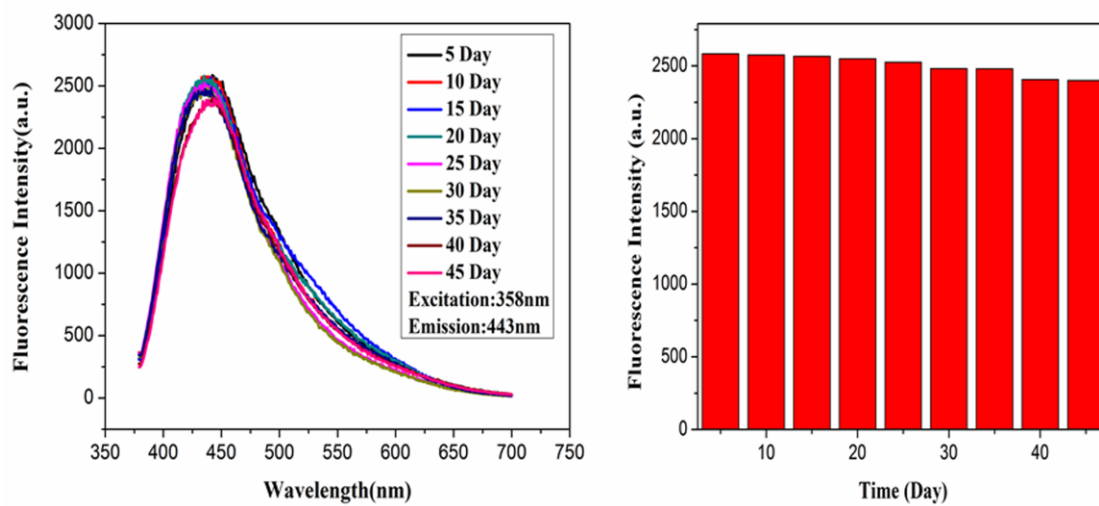

**Figure S11.** Fluorescence spectra of the PdCuAu NPs with time ranging from 5 to 45 day.



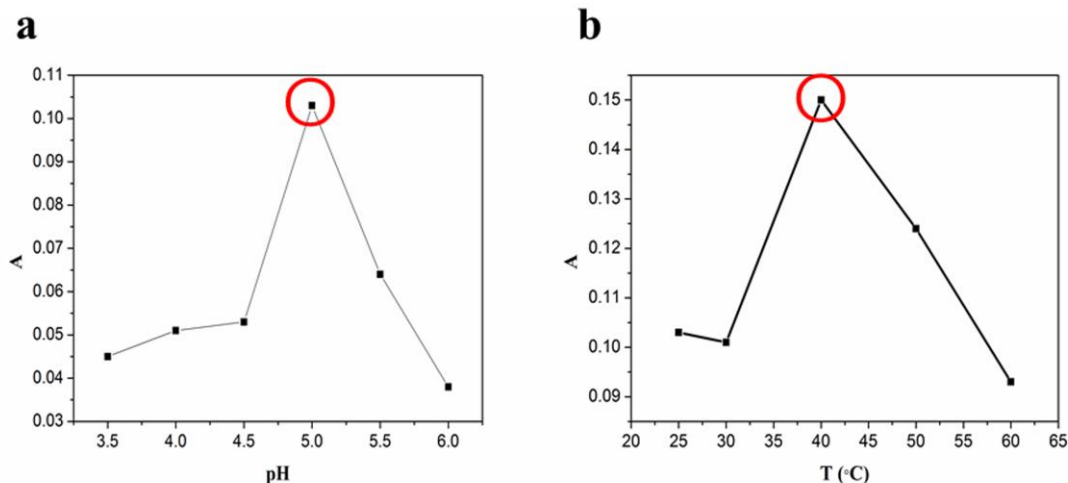

**Figure S12.** The effect of pH (a) and temperature (b) on the catalytic activity of PdCuAu NPs.

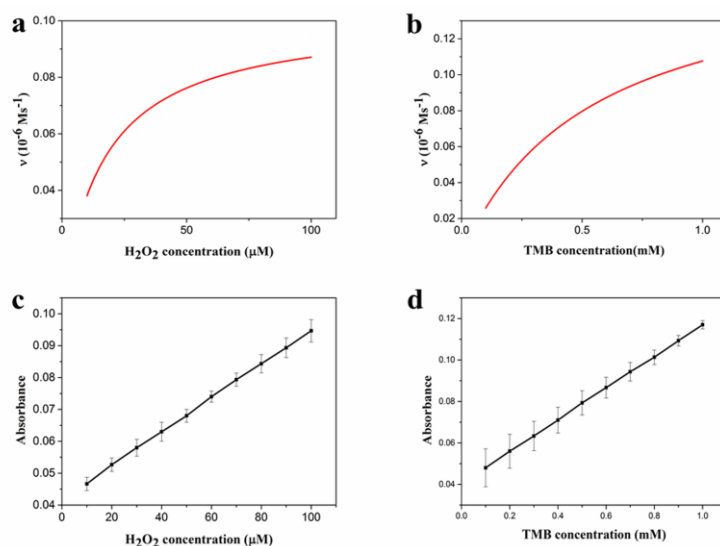

**Figure S13.** Steady-state kinetic analysis by the Michaelis-Menten model and catalytic mechanism of the reaction catalyzed by PdCuAu NPs. (a): TMB concentration was fixed at 1.0 mM and the  $\text{H}_2\text{O}_2$  concentration was varied. (b):  $\text{H}_2\text{O}_2$  concentration was fixed at 0.1 mM and the TMB concentration was varied. (c, d): Error bars represent the standard deviation based on three repeated measurements.

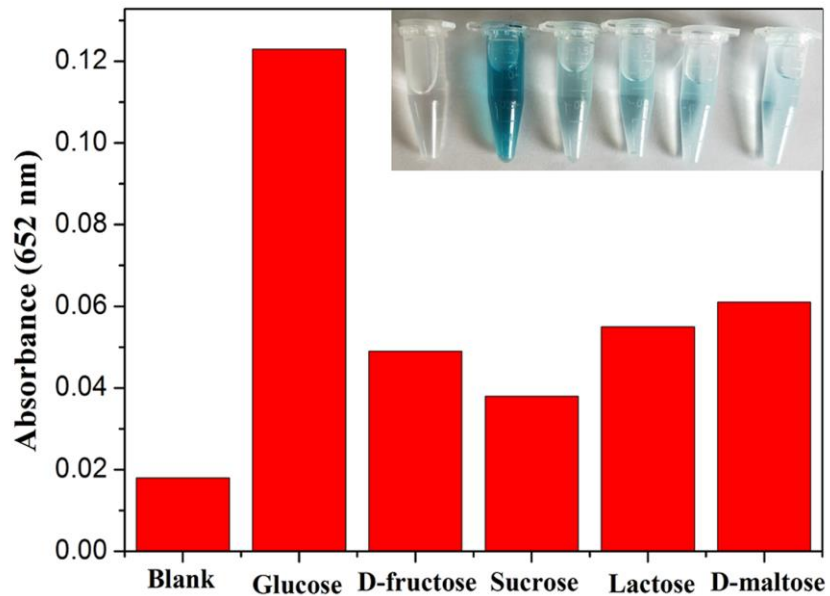

**Figure S14.** The selectivity of the glucose/GOx/PdCuAu NPs/TMB.

**Table S1 Comparison of the kinetic parameters of PdCuAu NPs with other reported typical enzyme mimics.  $K_m$  is the Michaelis-Menten constant,  $V_{max}$  is the maximal reaction**

velocity, [E] is the concentration of nanoparticles and  $k_{\text{cat}}$  is the catalytic constant, where  $k_{\text{cat}} = V_{\text{max}} / [E]$ .

| Catalyst                                               | [E] (M)               | Substrate              | $K_m$ (mM) | $V_{\text{max}}$<br>( $10^{-7}\text{Ms}^{-1}$ ) | $k_{\text{cat}}$ ( $\text{s}^{-1}$ ) | Ref       |
|--------------------------------------------------------|-----------------------|------------------------|------------|-------------------------------------------------|--------------------------------------|-----------|
|                                                        |                       | $\text{H}_2\text{O}_2$ | 173.51     | 1.89                                            | $0.75 \times 10^2$                   |           |
| $\text{Co}_3\text{O}_4$                                | $2.53 \times 10^{-9}$ | TMB                    | 0.10       | 2.56                                            | $1.01 \times 10^2$                   | [S1]      |
| PVP-Ir                                                 |                       | $\text{H}_2\text{O}_2$ | 266        | 3.85                                            | $1.96 \times 10^2$                   |           |
| NPs                                                    | $1.97 \times 10^{-9}$ | TMB                    | 0.02       | 1.08                                            | $0.55 \times 10^2$                   | [S2]      |
|                                                        |                       | $\text{H}_2\text{O}_2$ | 188        | 3200                                            | $7.55 \times 10^3$                   |           |
| Ft-Pt NPs                                              | $4.24 \times 10^{-8}$ | TMB                    | 0.22       | 5.58                                            | $0.13 \times 10^2$                   | [S3]      |
|                                                        |                       | $\text{H}_2\text{O}_2$ | 199.4      | 0.93                                            | $7.20 \times 10^4$                   |           |
| Au-Ft                                                  | $1.3 \times 10^{-12}$ | TMB                    | 0.097      | 0.75                                            | $5.80 \times 10^4$                   | [S4]      |
| $\text{Fe}_3(\text{PO}_4)_2 \cdot 8\text{H}_2\text{O}$ |                       | $\text{H}_2\text{O}_2$ | 0.11       | 5.58                                            | $2.11 \times 10^5$                   |           |
|                                                        | $2.6 \times 10^{-12}$ | TMB                    | 0.36       | 1.58                                            | $6.00 \times 10^4$                   | [30]      |
| PdCuAu                                                 |                       | $\text{H}_2\text{O}_2$ | 0.16       | 1.2                                             | $2.18 \times 10^4$                   |           |
| NPs                                                    | $5.5 \times 10^{-12}$ | TMB                    | 0.54       | 1.7                                             | $3.09 \times 10^4$                   | This work |

## References

[S1] Mu, J.; Wang, Y.; Zhao, M.; Zhang, L. Intrinsic peroxidase-like activity and catalase-like activity of Co<sub>3</sub>O<sub>4</sub> nanoparticles. *Chem. Commun.* **2012**, *48*, 2540–254.

[S2] Su, H.; Liu, D. D.; Zhao, M.; Hu, W. L.; Xue, S. S.; Cao, Q.; Le, X. Y.; Ji, L. N.; Mao, Z. W. Dual-Enzyme Characteristics of Polyvinylpyrrolidone-Capped Iridium Nanoparticles and Their Cellular Protective Effect against H<sub>2</sub>O<sub>2</sub>-Induced Oxidative Damage. *ACS Appl. Mater. Interfaces* **2015**, *7*, 8233–8242.

[S3] Fan, J.; Yin, J. J.; Ning, B.; Wu, X.; Hu, Y.; Ferrari, M.; Anderson, G. J.; Wei, J.; Zhao, Y.; Nie, G. Direct evidence for catalase and peroxidase activities of ferritin-platinum nanoparticles. *Biomaterials* **2011**, *32*, 1611–1618.

[S4] Jiang, X.; Sun, C.; Guo, Y.; Nie, G.; Xu, L. Peroxidase-like activity of apoferritin paired gold clusters for glucose detection. *Biosens. Bioelectron.* **2015**, *64*, 165–170.
